# Supplementary material
Source: Springer Nature journal article supplement (https://www.springermedizin.de/resource/supplementary/12879_2008_828_MOESM4_ESM.pdf/9449878)

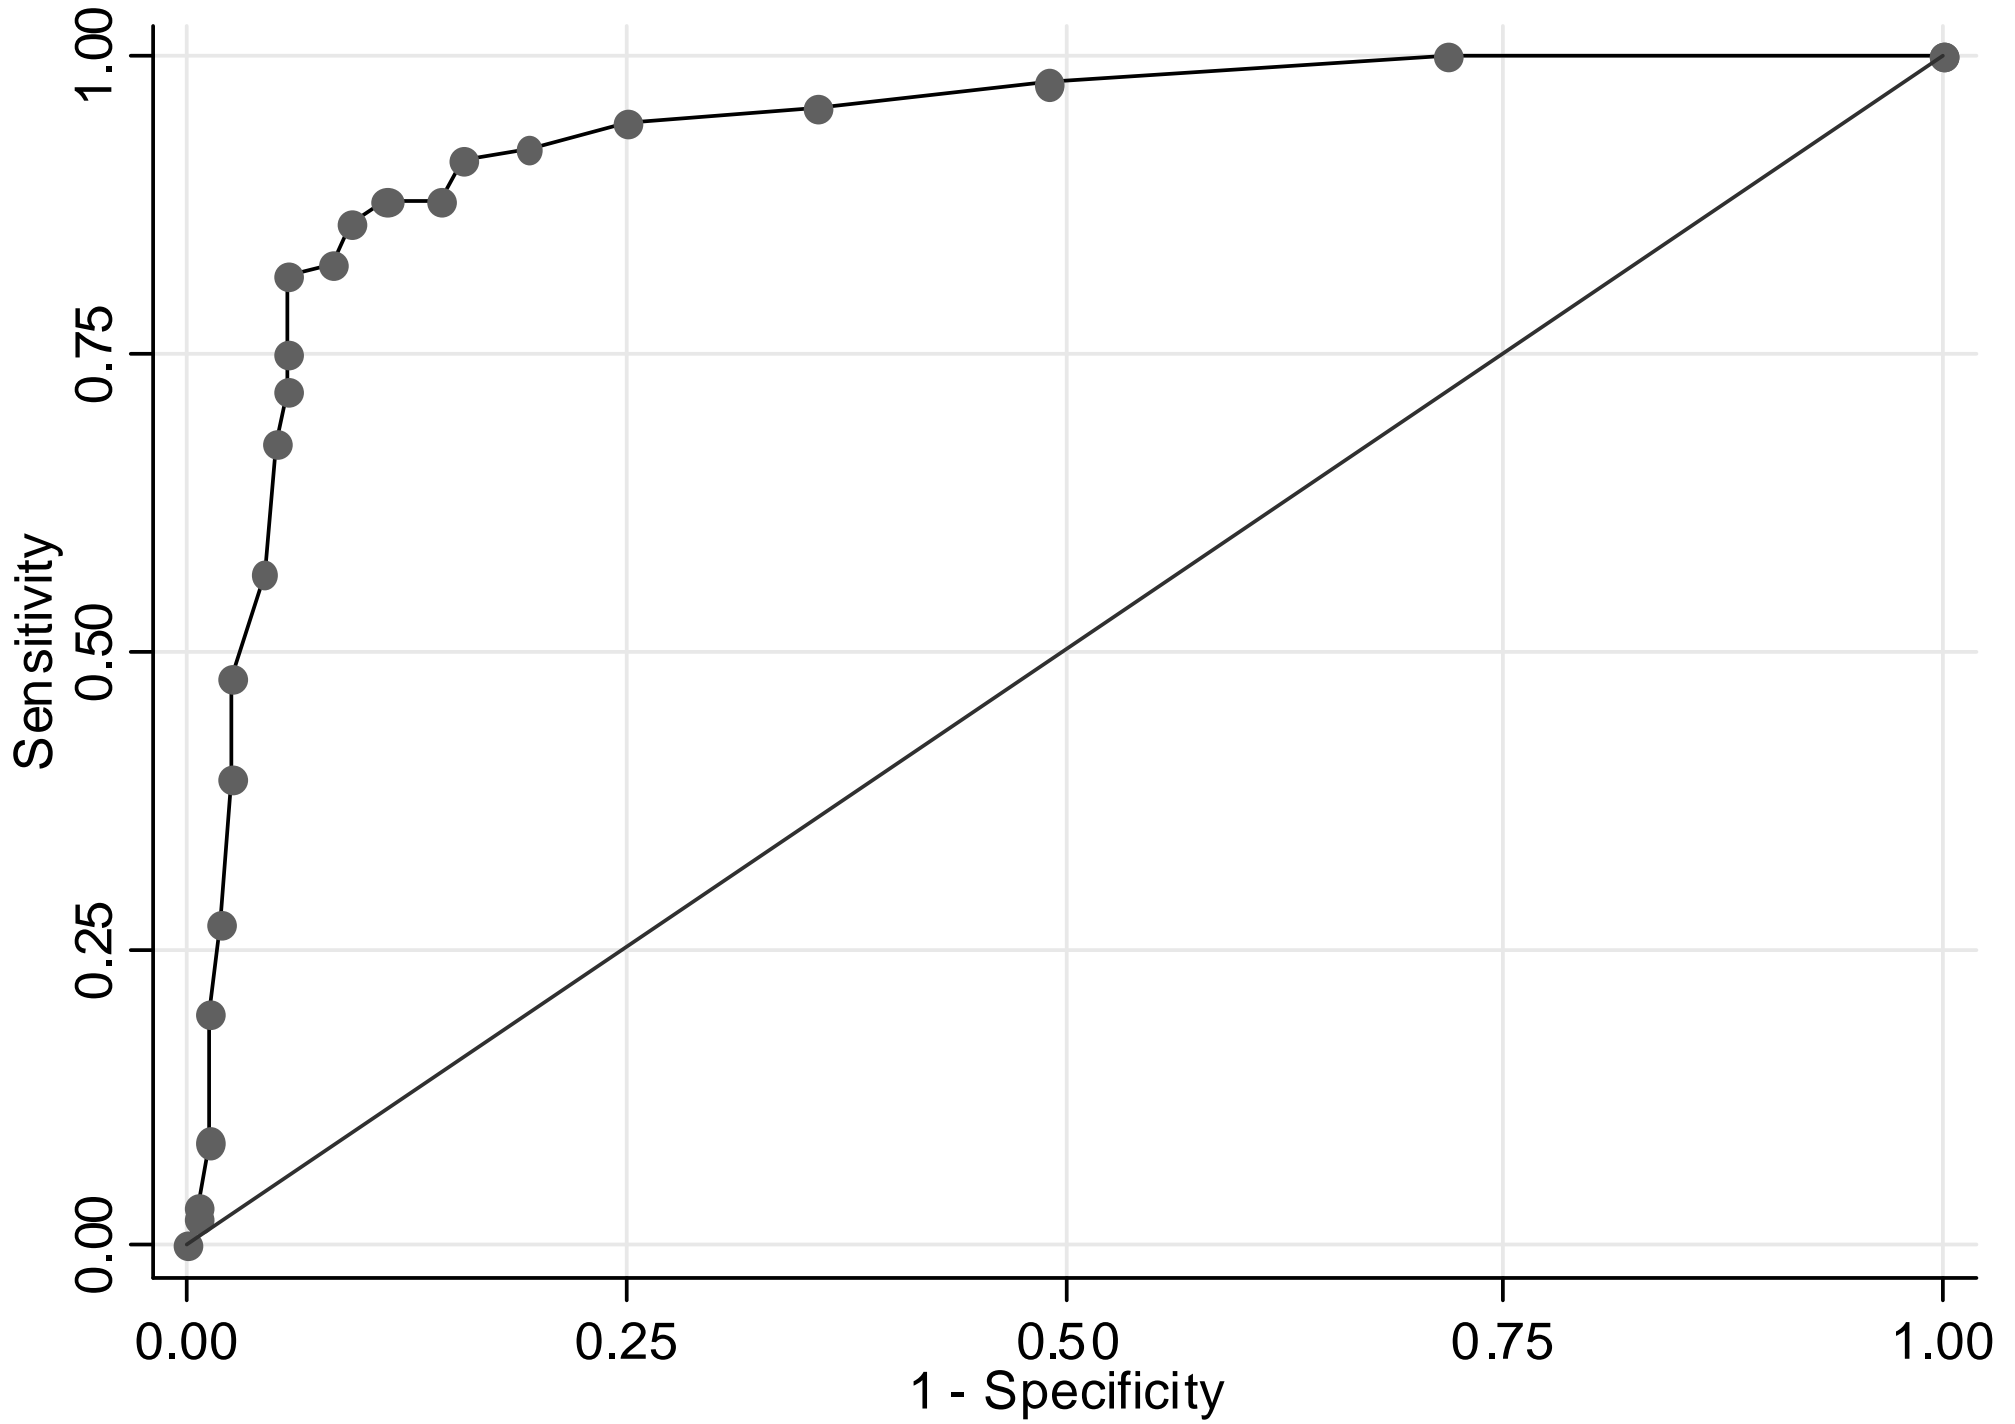

Supplement: MOESM4 [file 9449878]
